# Supplementary material
Source: PubMed Central journal article supplement (PMC7177639)
Supplement: jamacardiol-5-685-s001.pdf [file jamacardiol-5-685-s001.pdf]

## Supplementary Online Content

Robinson AA, Trankle CR, Eubanks G, et al. Off-label use of direct oral anticoagulants compared with warfarin for left ventricular thrombi. *JAMA Cardiol.* Published online April 22, 2020. doi:10.1001/jamacardio.2020.0652

**eTable 1.** Types of Cardiomyopathy

**eTable 2.** Antiplatelet Therapy

**eTable 3.** Timing and Reasons for Anticoagulation Changes

**eTable 4.** Comparison of Oral Anticoagulant at the Time of SSE With the Initial Agent

**eAppendix 1.** Patient Follow-Up and Anticoagulation Duration

**eAppendix 2.** Treatment Switching

**eAppendix 3.** Atrial Fibrillation

**eAppendix 4.** Cardiomyopathy Type

**eAppendix 5.** Events After Treatment Changes

**eFigure.** Survival Curves for Survival Free of Stroke and Systemic Embolism

This supplementary material has been provided by the authors to give readers additional information about their work.

**eTable 1.** Types of Cardiomyopathy

The types of cardiomyopathy of patients enrolled, including counts, is presented in eTable 1.

| Type of Cardiomyopathy | n   | %     |
|------------------------|-----|-------|
| Ischemic               | 308 | 59.9% |
| NICM NOS               | 130 | 25.3% |
| Unknown                | 40  | 7.8%  |
| Peripartum             | 11  | 2.1%  |
| Hypertrophic           | 8   | 1.6%  |
| Chemotherapy           | 7   | 1.4%  |
| Tachycardia            | 4   | 0.8%  |
| Stress                 | 4   | 0.8%  |
| Familial               | 2   | 0.4%  |

Number of enrolled patients with each type of cardiomyopathy, including non-ischemic cardiomyopathies (NICM). NOS = not otherwise specified.

**eTable 2.** Antiplatelet Therapy

|                             | DOAC       | Warfarin Only | Therapy Change | Neither    |
|-----------------------------|------------|---------------|----------------|------------|
| <b>No Antiplatelet</b>      | 44 (36.4%) | 72 (30.5%)    | 26 (40.6%)     | 32 (34.4%) |
| <b>ASA</b>                  | 56 (46.3%) | 109 (46.2%)   | 26 (40.6%)     | 44 (47.3%) |
| <b>DAPT</b>                 | 10 (8.3%)  | 43 (18.2%)    | 11 (17.2%)     | 14 (15.1%) |
| <b>P2Y12 Inhibitor Only</b> | 11 (9.1%)  | 12 (5.1%)     | 1 (1.6%)       | 3 (3.2%)   |
| <b>Total</b>                | 121        | 236           | 64             | 93         |

**eAppendix 1. Patient Follow-Up and Anticoagulation Duration**

Median follow-up in patients treated with any oral anticoagulant was 418 days (IQR 139 – 927 days). Median treatment duration with all oral anticoagulation was 207 days (IQR 57 – 491.5 days), compared with median treatment of 241 days (IQR 47 – 579.5 days) with warfarin and 95.5 days with DOACs (IQR 69 – 373 days). Across all patients, aggregated treatment periods with warfarin and DOACs were 138,264 and 57,906 days, respectively.

**eAppendix 2. Treatment Switching**

Of the 64 patients who changed oral anticoagulant classes, there were a total of 71 switches, such that 7 patients changed twice between anticoagulant classes. Of these changes, 52 (73.2%) involved the switch from warfarin to a DOAC, and 19 (26.8%) were the result of changing from a DOAC to warfarin. Warfarin-to-DOAC switches tended to occur later after the diagnosis of LV thrombus (277 days, IQR 9.5 – 406.5 days), as compared to DOAC-to-warfarin switches (43 days, IQR 7 – 220 days). The most common cause of a warfarin-to-DOAC switch was convenience (10 switches or 19.2% of the total), whereas the most common cause of a DOAC-to-warfarin switch was cost (6 switches or 31.6% of the total).

There were no DOAC-to-warfarin switches for bleeding, compared with 3 (5.8%) warfarin-to-DOAC switches prompted by bleeding. There were 4 (21.1%) DOAC-to-warfarin switches prompted by effectiveness concerns, including thrombus non-resolution, compared with 2 (1.9%) warfarin-to-DOAC switches for this same reason. There were 8 (15.4%) warfarin-to-DOAC switches made out of concerns about medication adherence, but no DOAC-to-warfarin changes due to adherence concerns. The warfarin-to-DOAC switches for adherence concerns were followed by a total of 3 SSE. Given this, we performed a sensitivity analysis, excluding the 3 SSE on DOACs that occurred after a switch from warfarin due to concern about medication adherence. After this adjustment, anticoagulation with DOAC remained a significant predictor of SSE on univariable Cox regression (HR vs warfarin 2.16, 95% CI 1.01 – 4.61,  $p = 0.048$ ).

A more comprehensive description of the timing and reasons for anticoagulation changes is included in eTable 3.

**eTable 3.** Timing and Reasons for Anticoagulation Changes

|                                     | <b>Warfarin to<br/>DOAC</b> | <b>DOAC to<br/>Warfarin</b> | <b>All Changes</b> |
|-------------------------------------|-----------------------------|-----------------------------|--------------------|
| <b>Total</b>                        | 52                          | 19                          | 71                 |
| <b>Time, median (days)</b>          | 277                         | 43                          | 207                |
| <b>Time, IQR (days)</b>             | 9.5 - 406.5                 | 7 - 220                     | 6 - 278.5          |
| <b>Reason for Change</b>            |                             |                             |                    |
| <b>Cost</b>                         | 1 (1.9%)                    | 6 (31.6%)                   | 7 (9.9%)           |
| <b>Convenience</b>                  | 10 (19.2%)                  | 0                           | 10 (14.1%)         |
| <b>Labile INR Values</b>            | 8 (15.4%)                   | 0                           | 8 (11.3%)          |
| <b>Adherence</b>                    | 8 (15.4%)                   | 0                           | 8 (11.3%)          |
| <b>Effectiveness<br/>Concerns</b>   | 2 (3.8%)                    | 4 (21.1%)                   | 6 (8.5%)           |
| <b>Change in Renal<br/>Function</b> | 0                           | 1 (5.3%)                    | 1 (1.4%)           |
| <b>Bleeding</b>                     | 3 (5.8%)                    | 0                           | 3 (4.2%)           |
| <b>Alternate Indication</b>         | 9 (17.3%)                   | 3 (15.8%)                   | 12 (16.9%)         |
| <b>Other</b>                        | 4 (7.7%)                    | 2 (10.5%)                   | 6 (8.5%)           |
| <b>Unknown</b>                      | 7 (13.5%)                   | 3 (15.8%)                   | 10 (14.1%)         |

**eAppendix 3. Atrial Fibrillation**

In a univariable Cox regression model, a history of AF was not predictive of SSE (HR 0.94, 95% CI 0.49 – 1.79,  $p = 0.85$ ). We also performed a subgroup analysis, excluding patients with a history of AF. This resulted in exclusion of 121 patients and 23 events. In a univariable Cox regression model of patients without AF, anticoagulation with a DOAC was a predictor of SSE (HR vs warfarin 2.59, 95% CI 1.20 – 5.63,  $p = 0.02$ ).

**eAppendix 4. Cardiomyopathy Type**

In order to account for differences in endomyocardial pathology and thus thrombogenesis between ischemic and non-ischemic cardiomyopathies, we repeated our primary analysis among subgroups, according to type of cardiomyopathy. Among patients with non-ischemic cardiomyopathy (n = 204, events = 15) anticoagulation with a DOAC remained a predictor of SSE (HR vs warfarin 3.13, 95% CI 1.04 – 9.37, p = 0.04). However, the statistical difference between DOACs and warfarin was not preserved in the sub-group of patients with ischemic cardiomyopathy (n = 310, SSE = 16, HR vs warfarin 2.17, 95% CI 0.8 – 5.86, p = 0.13).

**eAppendix 5.** Events After Treatment Changes

In order to account for the possibility that events occurring soon after a change in anticoagulation strategy could mechanistically result from, but would not be linked to, an oral anticoagulation regimen, we performed a sensitivity analysis, re-attributing any SSE occurring within 30 days after a change in oral anticoagulation regimen to the preceding anticoagulant. There were only 2 such events, both occurring within 30 days of warfarin discontinuation. There were no such events within 30 days after discontinuation of a DOAC. On Cox univariable regression, anticoagulation with a DOAC was a predictor of SSE (HR vs warfarin 2.34, 95% CI 1.17 – 4.71,  $p = 0.02$ ).



**eTable 4.** Comparison of Oral Anticoagulant at the Time of SSE With the Initial Agent

|                 | <b>Initial oral anticoagulant</b> | <b>Oral anticoagulant at time of SSE</b> |
|-----------------|-----------------------------------|------------------------------------------|
| <b>Warfarin</b> | 27                                | 14                                       |
| <b>DOAC</b>     | 11                                | 17                                       |
| <b>None</b>     |                                   | 7                                        |

**Figure.** Survival Curves for Survival Free of Stroke and Systemic Embolism

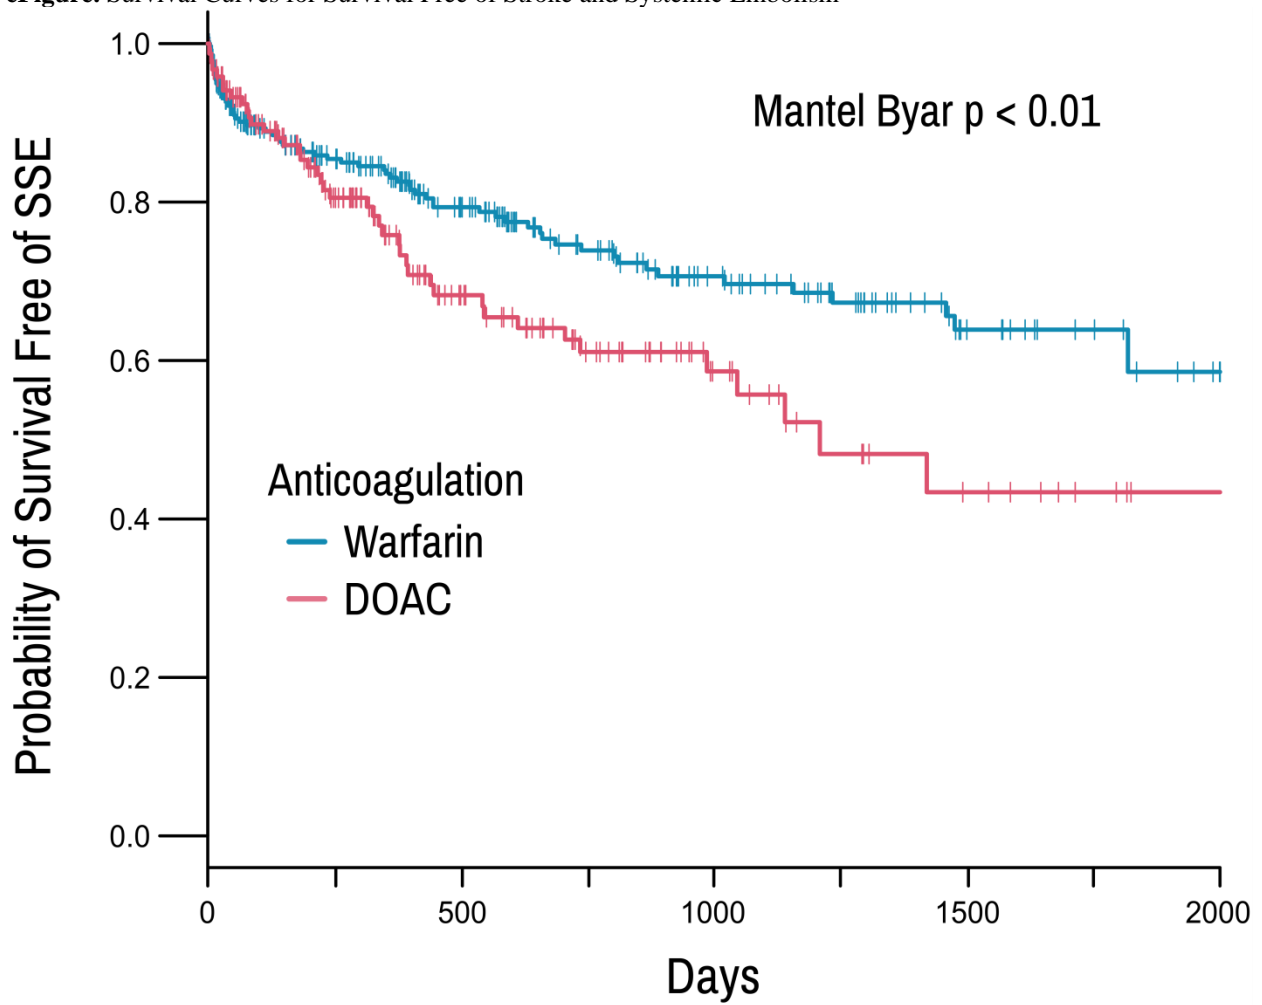

|          | Number at risk |     |     |     |      |      |      |      |      |
|----------|----------------|-----|-----|-----|------|------|------|------|------|
|          | 0              | 250 | 500 | 750 | 1000 | 1250 | 1500 | 1750 | 2000 |
| Warfarin | 87             | 193 | 138 | 99  | 73   | 59   | 33   | 28   | 17   |
| DOAC     | 64             | 80  | 50  | 37  | 22   | 12   | 9    | 5    | 2    |

Survival free from a composite of death, stroke and systemic embolism in patients with left ventricular thrombus after index echocardiograph, Mantel Byar  $p < 0.01$ .
